# Supplementary material
Source: PubMed Central journal article supplement (PMC4666293)
Supplement: NIHMS739801-supplement-Supporting_Information.pdf [file NIHMS739801-supplement-Supporting_Information.pdf]

## Supplementary Information

# POST-TRANSCRIPTIONAL REGULATION BY DISTAL SHINE-DALGARNO SEQUENCES IN THE *GRPE-DNAK* INTERGENIC REGION OF *STREPTOCOCCUS MUTANS*

Sara R. Palmer and Robert A. Burne\*

Department of Oral Biology, University of Florida, College of Dentistry,  
Gainesville, Florida 32610 USA

Running title: Control of molecular chaperone expression

\*Corresponding Author:  
Department of Oral Biology  
University of Florida  
1395 Center Drive  
P.O. Box 100424  
Gainesville, FL 32610  
Email: [rburne@dental.ufl.edu](mailto:rburne@dental.ufl.edu)

**Table S1. Strains and Plasmids used in this study**

| <b>Strains</b>        | <b>Source</b>                                                                                                             |            |
|-----------------------|---------------------------------------------------------------------------------------------------------------------------|------------|
| UA159                 | <i>S. mutans</i> clinical isolate                                                                                         | Lab stock  |
| SP50                  | pSP01-2 (Full length IGR66 pLDH and CAT)                                                                                  | This study |
| SP51                  | pSP02-pLDH-CAT deletion of IGR                                                                                            | This study |
| SP52                  | pSP03 Δ5' loop (-244bp 5' end)                                                                                            | This study |
| SP53                  | pSP04 Δ5' loop (-214bp 5' end)                                                                                            | This study |
| SP54                  | pSP05 Δ81bp from 5' end                                                                                                   | This study |
| SP55                  | pSP06 Δ48bp from 5' end                                                                                                   | This study |
| SP56                  | pSP07 Δ5' loop (-301 bp from 5' end)                                                                                      | This study |
| SP57                  | pSP08 Δ3' loop (-229-350 bp from 3' end)                                                                                  | This study |
| SP58                  | pSP09 1-86 of 5' end intact (-86-350 bp from 3' end)                                                                      | This study |
| SP59                  | pSP10 Partial deletion of 3' loop (-302-350bp of IGR 66)                                                                  | This study |
| NC-RBS #1 & #2 G to C | NC-RBSs GAAGGAAUUAAGAAAGG to CACCAAATTAACAAACC                                                                            | This study |
| NC-RBS #1 & #2 G to A | NC-RBSs GAAGGAAUUAAGAAAGG to AAAAAAUUAAAAAAAA                                                                             | This study |
| NC-RBS #1 G to A      | NC-RBS #1 GAGG to AAAA                                                                                                    | This study |
| NC-RBS #2 G to A      | NC-RBS #2 GAAAGGA to AAAAAA                                                                                               | This study |
| Δ 3'SL                | Deletion of 3'SL bp 265-358 of <i>igr66</i>                                                                               | This study |
| <b>Plasmids</b>       |                                                                                                                           |            |
| pGEMT                 | Cloning vector                                                                                                            | Promega    |
| pJL105                | <i>S. mutans</i> integration vector - <i>phnA-mtlA</i> locus (Kan <sup>r</sup> , Spec <sup>r</sup> and Erm <sup>r</sup> ) | Burne lab  |
| pSP01                 | pJL105 with <i>Pldh-igr66-cat</i>                                                                                         | This study |
| pSP02                 | Q5-mutagenesis of pSP01 primers: SP31F-A and SP31R-B                                                                      | This study |
| pSP03                 | Q5-mutagenesis of pSP01 primers: SP32F-E and SP31R-B                                                                      | This study |
| pSP04                 | Q5-mutagenesis of pSP01 primers: SP34F-F and SP31R-B                                                                      | This study |
| pSP05                 | Q5-mutagenesis of pSP01 primers: SP35F-G and SP31R-B                                                                      | This study |
| pSP06                 | Q5-mutagenesis of pSP01 primers: SP37F-I and SP31R-B                                                                      | This study |
| pSP07                 | Q5-mutagenesis of pSP01 primers: SP31F-A and SP38R-J                                                                      | This study |
| pSP08                 | Q5-mutagenesis of pSP01 primers: SP35F-G and SP31R-B                                                                      | This study |
| pSP09                 | Q5-mutagenesis of pSP01 primers: SP31F-A and SP36R-H                                                                      | This study |
| pSP10                 | Q5-mutagenesis of pSP01 primers: SP31F-A and SP39R-K                                                                      | This study |

**Table S2. Primers used in this study**

---

|                                                        |                               |                                            |
|--------------------------------------------------------|-------------------------------|--------------------------------------------|
| <b>Promoter IGR66 fusion to CAT</b>                    |                               |                                            |
| SP27F                                                  | LDH promoter with BamHI site  | AAAGGATCCTGTGACGGTAAGACCACCATT             |
| SP27R                                                  | LDH promoter (IGR66 overhang) | GGACAAATTGTTAAGTATATATTCTATACATTTTCATT     |
| SP28F                                                  | IGR66 with pLDH overhang      | GAATATATACTTAACAATTTGTCCGAAACGACAGTAAA     |
| SP28R                                                  | IGR66 with CAT overhang       | ATTAAGTTCATAATAATGTTACCAAGAACGCCGAAA       |
| SP29F                                                  | CAT with IGR66 overhang       | GGTAACATTATTATGAACTTTAATAAAAATTGATTTAGACAA |
| SP29R                                                  | CAT with Sph1 site            | AAAGCATGCTTATAAAAAGCCAGTCATTAGGCCTA        |
| <b>IGR66 deletion constructs- Loop-out mutagenesis</b> |                               |                                            |
| SP31F-A                                                | SP51, SP57, SP58, SP59        | CGGCGTTCTTGGTAACATTATT                     |
| SP31R-B                                                | SP51-SP56                     | AAGTATATATTCTATACATTTTCATT                 |
| SP32R-D                                                | SP57                          | TTTGCTATTTCCCTTAGTAGTG                     |
| SP32F-E                                                | SP52                          | GAGGAATTAAGAAAAGGATTTGAA                   |
| SP34F-F                                                | SP53                          | GGGAAATAGCAAAAAAGAAAAATA                   |
| SP35F-G                                                | SP54                          | ACTACAGCGATATTTCCCGAT                      |
| SP36R-H                                                | SP58                          | GTAGTTTGCTTCGCTCACTGTA                     |
| SP37F-I                                                | SP55                          | GAGCTCAGCTTTGCCTACAGT                      |
| SP38F-J                                                | SP56                          | CTAGCACTTATTGAATGCGTCGT                    |
| SP39R- K                                               | SP59                          | GCGGTTTATCTATTTTCCGAAGT                    |
| <b>IGR66 NC-RBS mutation</b>                           |                               |                                            |
| SP81F                                                  | NC-RBS G's to C's             | ACAAACCATTTGAACCCGAACACTAATAC              |
| SP81R                                                  | NC-RBS G's to C's             | TAATTGGTGTTAAATATTTTTCTTTTTTGCTATTTCC      |
| SP86F                                                  | NC-RBS G's to A's             | AAAAAAAAATTTGAACCCGAACACTAATAC             |
| SP86R                                                  | NC-RBS G's to A's             | AATTTTTTTTTAAATATTTTTCTTTTTTGCTATTTCC      |
| SP101F                                                 | NC-RBS-1 G's to A's           | AGAAAGGATTTGAACCCGAACACTAATAC              |
| SP102R                                                 | NC-RBS-1 G's to A's           | TAATTTTTTTTTAAATATTTTTCTTTTTTGCTATTTCC     |
| SP103F                                                 | NC-RBS-2 G's to A's           | AAATTTGAACCCGAACACTAATAC                   |
| SP103R                                                 | NC-RBS-2 G's to A's           | TTTTTTAATTCCTCTTTAAATATTTTTCTTTTTTG        |
| SP83F-new                                              | $\Delta$ 3' SL                | CTTGGTAACATTATTATGAACTTTAATAAAAATTG        |
| SP83R                                                  | $\Delta$ 3' SL                | AAATCCTTTCTTAATTCCTCTTTAAATATTTTTCC        |
| SP80F                                                  | 888-910-bp in <i>hrcA</i>     | GGGTTTGGAAATTTTGACCGTAA                    |
| SP80R                                                  | 924-944-bp in <i>dnaK</i>     | CGTGTTGAACCGCCGACTAA                       |
| SP105F                                                 | NC-RBS-2 G's to A's MM        | GAGGAATTAATAAAAATTTGAACCCGAA               |
| SP105R                                                 | NC-RBS-2 G's to A's MM        | TTGCGGTTCAAATTTTTTTTTTAATTCCTC             |
| <b>Real-time primers</b>                               |                               |                                            |
| RT-Cat-F                                               | RT-PCR of <i>cat</i>          | GTTACAATAGCGACGGAGAGTT                     |
| RT-Cat                                                 | RT-PCR of <i>cat</i>          | GGAGTCCAAATACCAGAGAATGT                    |
| RT-16S F                                               | RT-PCR 16S RNA                | ACGTGTGTGAGAGTGGAAG                        |
| RT-16S R                                               | RT-PCR 16S RNA                | GCTCCCTTTACGCCAATAA                        |
| RT-DnaK F                                              | RT-PCR for DnaK               | GAGCCTTTCTCGTGCTAAGT                       |
| RT-DnaK R                                              | RT-PCR for DnaK               | TGAACCGCCGACTAAGATAAC                      |
| <b>Probes for Northern Blot</b>                        |                               |                                            |
| IGR66 Fwd                                              | IGR66-217 bp probe            | GAGCTCAGCTTTGCCTACAGT                      |
| IGR66 Rev                                              | IGR66-5' Biotin label         | 5'Biotin-GTGCTAGGCGGTTTATCTATT             |
| DnaK Fwd                                               | DnaK for Northern probe       | GTTTTGGCAACTGCTGGAG                        |
| DnaK Rev                                               | DnaK for Northern Blot Probe  | CAAGTGACAATGGCGTTACG                       |
| HrcA Fwd                                               | HrcA for Northern probe       | GTGATTACCCAGCGTCAAAGGAT                    |
| HrcA Rev                                               | HrcA for Northern probe       | GCCAGTCAGATTCGCCAAAA                       |
| <b>5'RACE primers</b>                                  |                               |                                            |
| dnaK_GSP1                                              |                               | TGCTGCAGCTGTTGGTTCGTT                      |
| dnaK_GSP2                                              |                               | GTTCTACTTCAAGACCAGCGAT                     |
| dnaK_GSP3                                              |                               | GCATCGTTAAAGTAAGCAGGAA                     |

---

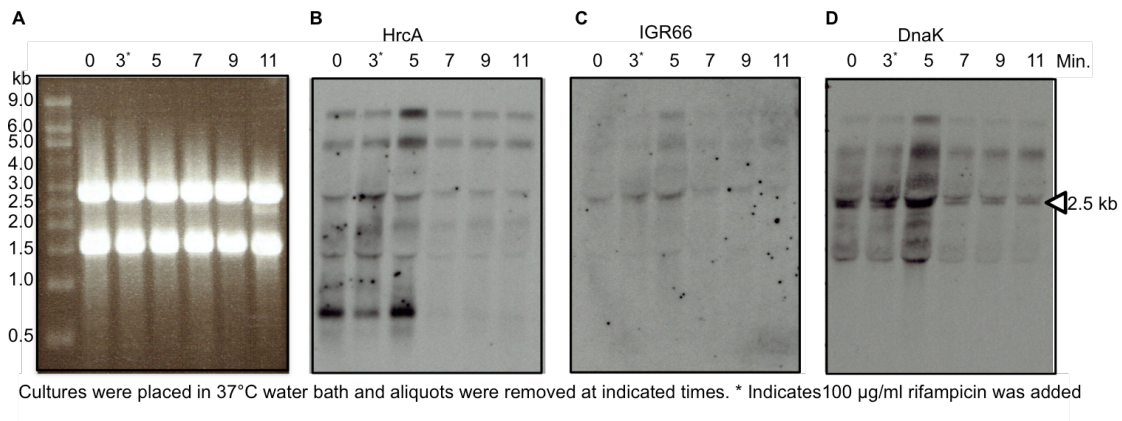

**Figure S1. Northern blot analysis of *dnaK* operon transcripts at 37°C.**

A) Ethidium bromide stained agarose gel with 5 µg of total RNA loaded per lane. Northern analysis using a probe against (B) *hrcA*, (C) *igr66* or (D) *dnaK*. Samples were incubated at 37°C. Cells were collected at time 0, then at the 3' time point rifampicin was added to a final concentration of 100 µg/ml. Aliquots were collected at the 3, 5, 7, 9 and 11 minute time points. RNA was prepared and Northern blots were performed as detailed in the methods section. The location of the 2.5 kb transcript recognized by the DnaK probe is indicated on the right of Panel D with an open arrow.

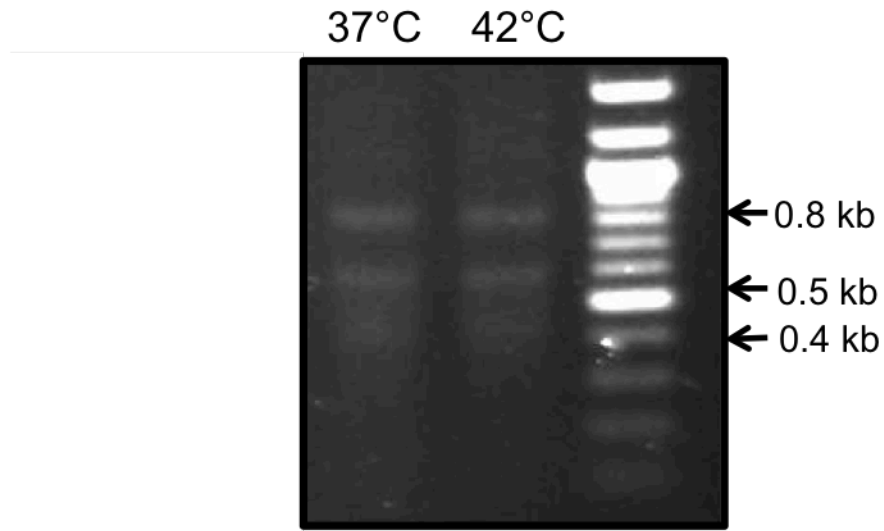

**Figure S2.** Agarose gel (1.3%) of 5'-RACE products using a *dnaK* gene-specific primer and RNA isolated from wild-type *S. mutans* UA159 grown at 37°C or heat shocked at 42°C for 3 minutes.



## Chromosomal integration of *cat* fusions into the mannitol PTS locus

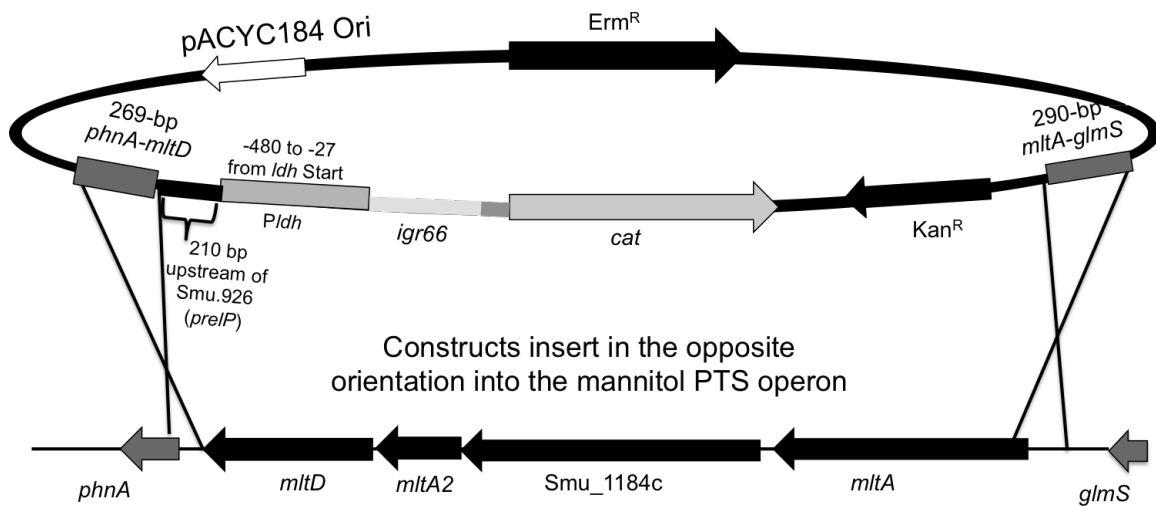

**Figure S4. Schematic diagram of the vector used to integrate reporter-gene fusions in single copy in the *S. mutans* chromosome.** Gene fusion-constructs were inserted into the chromosome by double cross-over recombination, replacing the mannitol PTS operon. See the methods section for more details.

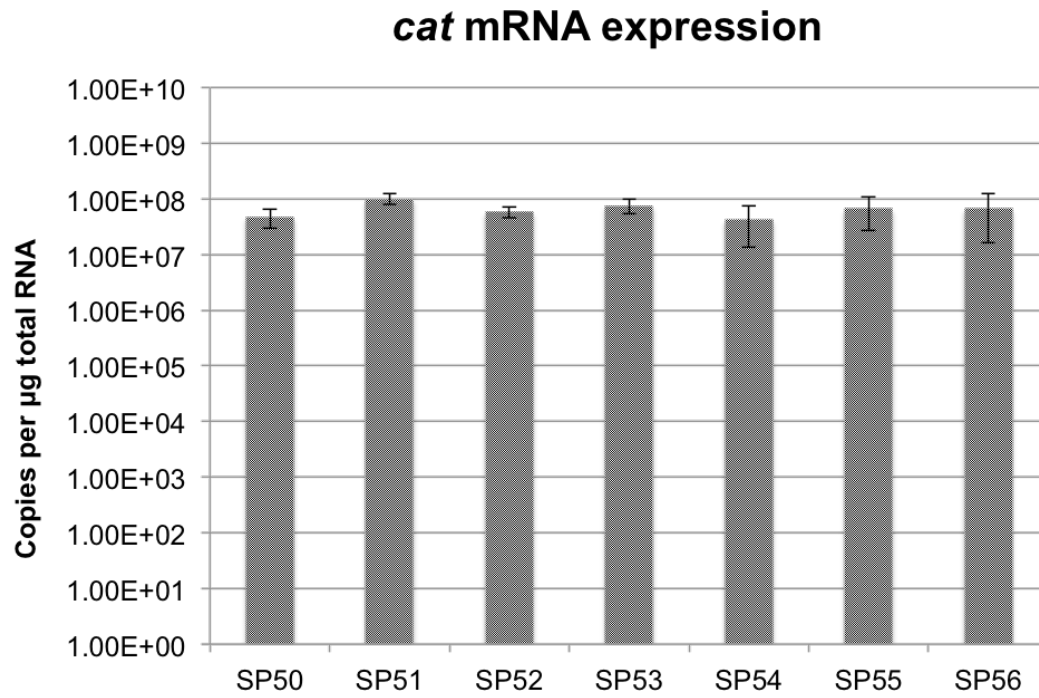

**Figure S5. *cat* mRNA expression in various constructs.** qRT-PCR results for *cat* gene mRNA expression in selected constructs, displayed as copies per µg of total RNA. See Figure 4 for methodological details.



Perfect RBS  
5' AAGGAGGUGA 3'

3' AUUCCUCCACUAGGUUGGCG 5' *E. coli* K-12 16S rRNA 3' terminus  
3' UCUUUCCUCCACUAGGUCGGC 5' *S. mutans* UA159 16S rRNA 3' terminus

**Figure S6. The 3' termini of the 16S rRNA of *E. coli* and *S. mutans*.** The sequence of a canonical Shine-Dalgarno (SD) sequence is on top. The sequences of the 3' termini of the 16S rRNAs from *E. coli* and *S. mutans*; the regions that are predicted to base pair with SD sequences in the mRNA are underlined.

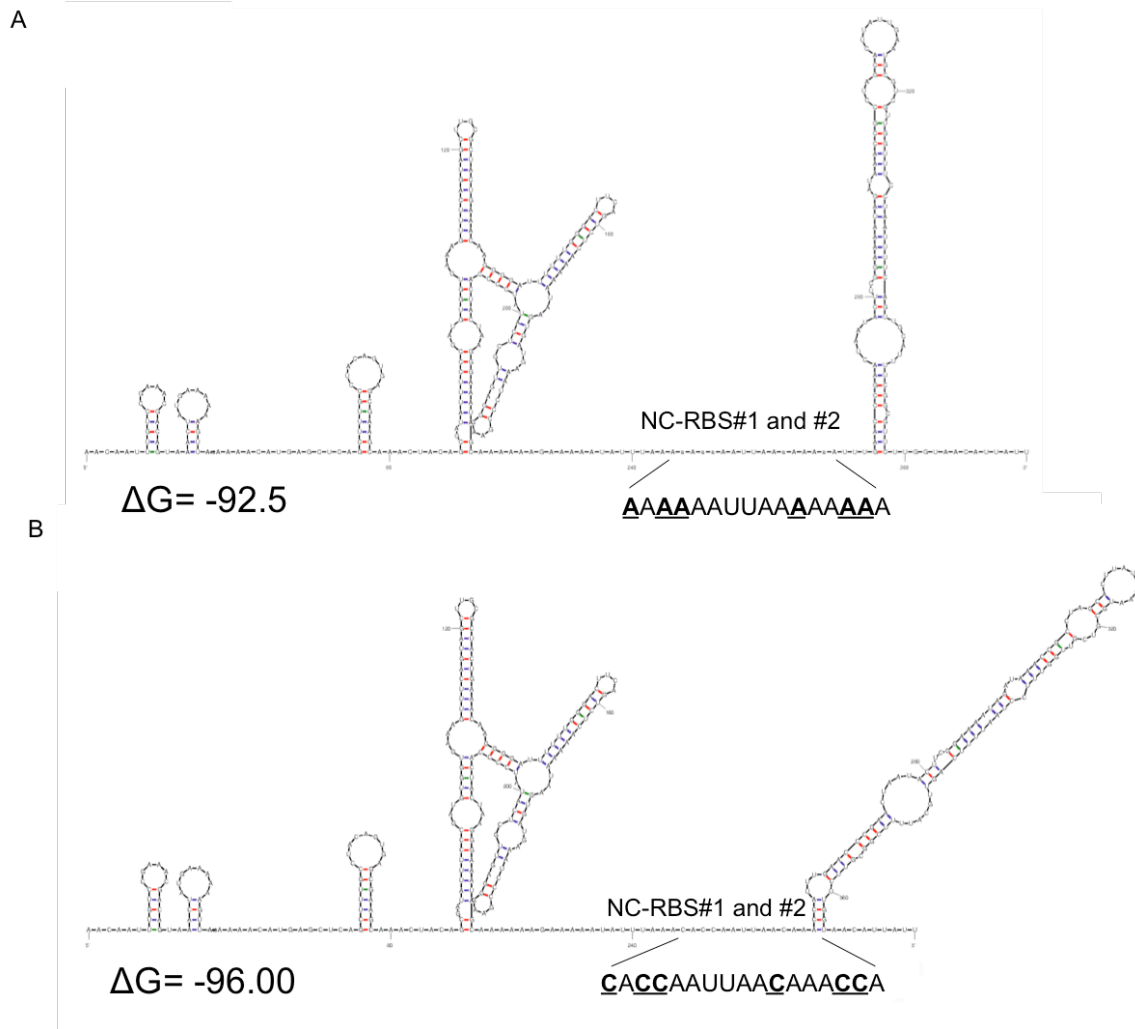

**Figure S7. Predicted secondary structure of *igr66* point mutants.** Secondary structures were predicted using the latest version of the mfold Web Server (<http://mfold.rna.albany.edu>). The predicted secondary structures shown are those that result from mutating the guanines in the NC-RBSs to adenines (Panel A) or cytosines (Panel B).

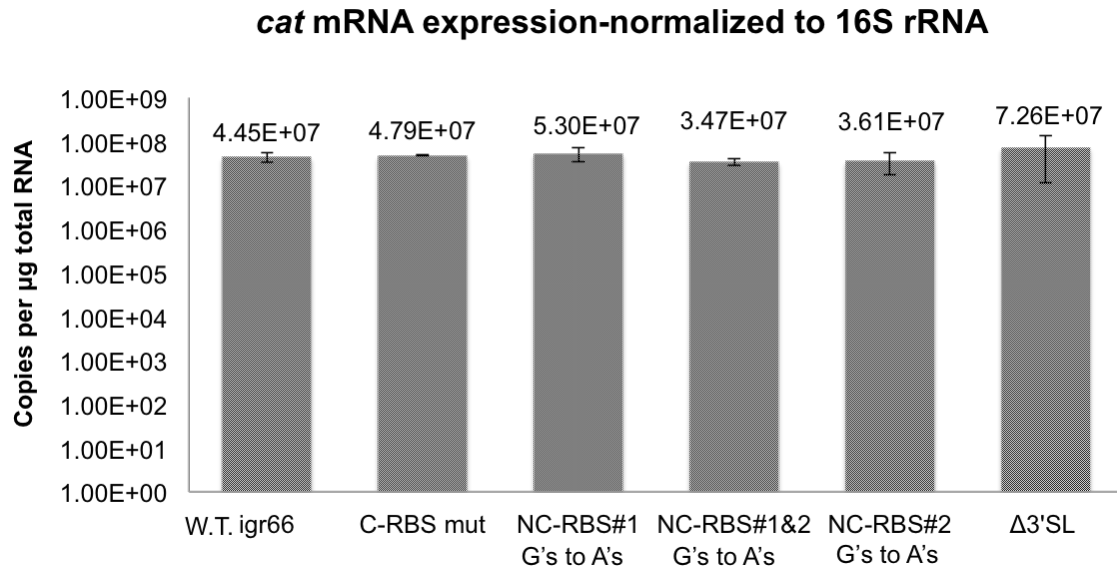

**Figure S8. mRNA expressed from constructs containing *igr66* and mutant derivatives.** qRT-PCR was performed to detect *cat* gene mRNA and the data are displayed as copies per  $\mu\text{g}$  of total RNA after normalization to 16S rRNA. See Figure 5 for details.

NC-RBS#2 point mutant

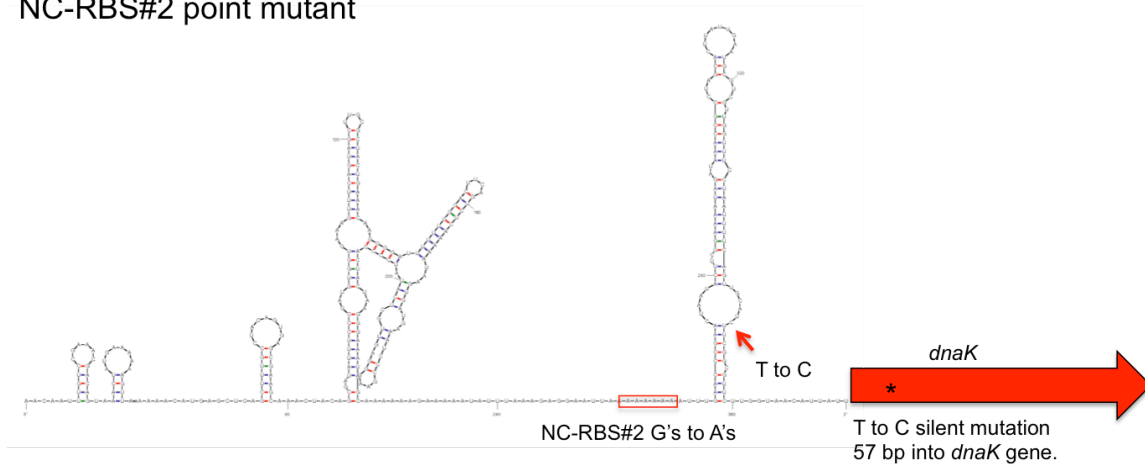

**Figure S9. Location of point mutations in the NC-RBS#2 markerless mutant, and the resulting predicted secondary structure.** A red box indicates the location of point mutations in NC-RBS #2. The location of additional mutations is also indicated, see text for details. The *dnaK* gene is shown as a red arrow. The construct was found to contain a silent point mutation at position 57 in the *dnaK* structural gene.

## A Distribution of 90 Blast Hits on the Query Sequence

Mouse-over to show define and scores. Click to show alignments

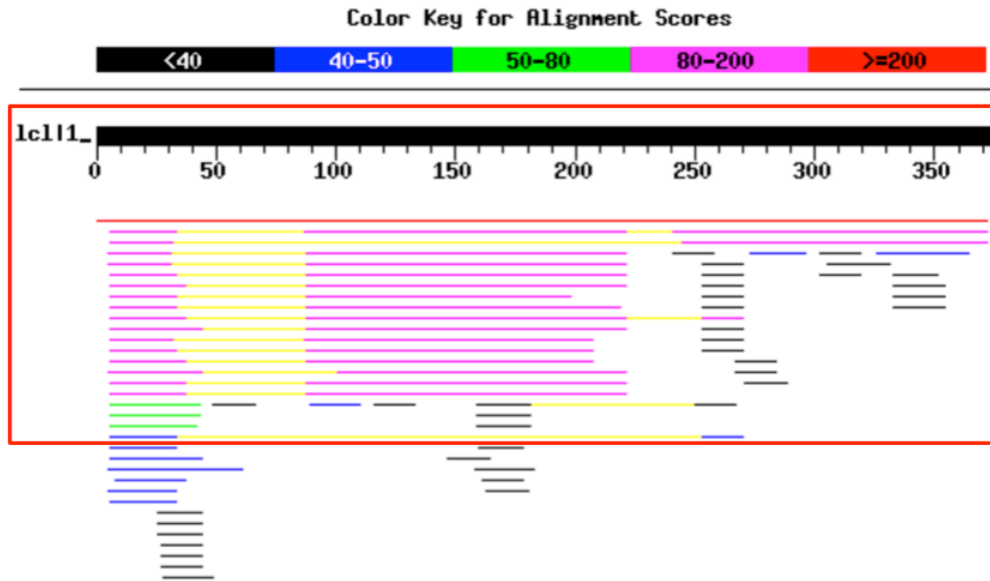

**B** Sequences producing significant alignments:

|                                                             | Score<br>(bits)     | E<br>Value |
|-------------------------------------------------------------|---------------------|------------|
| smut_c_1 Streptococcus mutans UA 159, ATCC 700610           | <a href="#">668</a> | 0.0        |
| sang2334_c_5 Streptococcus anginosus CCUG 39159             | <a href="#">135</a> | 8e-30      |
| scon_c_2 Streptococcus constellatus subsp. pharyngis SK1060 | <a href="#">135</a> | 8e-30      |
| sint2361_c_1 Streptococcus intermedius JTH08                | <a href="#">125</a> | 8e-27      |
| smit2_c_13 Streptococcus mitis biovar 2 SK95                | <a href="#">125</a> | 8e-27      |
| sot066_c_2 Streptococcus sp. oral taxon 066 F0442           | <a href="#">125</a> | 8e-27      |
| sint_c_2 Streptococcus intermedius F0413                    | <a href="#">125</a> | 8e-27      |
| spar_c_2 Streptococcus parasanguinis II F0405               | <a href="#">117</a> | 2e-24      |
| saus_c_7 Streptococcus australis ATCC 700641                | <a href="#">113</a> | 3e-23      |
| sora2005_c_1 Streptococcus oralis Uo5                       | <a href="#">109</a> | 5e-22      |
| smit1998_c_9 Streptococcus mitis ATCC 6249                  | <a href="#">109</a> | 5e-22      |
| scri_c_10 Streptococcus cristatus ATCC 51100                | <a href="#">105</a> | 7e-21      |
| solc_c_1 Streptococcus oligofermentans AS 1.3089            | <a href="#">103</a> | 3e-20      |
| sper_c_5 Streptococcus peroris ATCC 700780                  | <a href="#">103</a> | 3e-20      |
| sora_c_13 Streptococcus oralis ATCC 35037, SK23, NCTC11427  | <a href="#">100</a> | 4e-19      |
| smit_c_1 Streptococcus mitis NCTC 12261                     | <a href="#">94</a>  | 3e-17      |
| smit1067_c_1 Streptococcus mitis B6                         | <a href="#">86</a>  | 7e-15      |
| spne_c_1 Streptococcus pneumoniae AP200                     | <a href="#">52</a>  | 9e-05      |
| sot056_c_1 Streptococcus sp.oral taxon 056 F0418            | <a href="#">52</a>  | 9e-05      |
| sot058_c_8 Streptococcus sp. oral taxon 058 F0407           | <a href="#">50</a>  | 4e-04      |

**Figure S10. Blastn results using *igr66* against Oral Microbial Genomes annotated at the Human Oral Microbiome Database ([www.homd.org](http://www.homd.org)). (A) Multi-sequence alignment with areas of significant similarity indicated by a lines of the top 32 sequence hits. (B) The top 20 best hits with corresponding Blast scores and E-values. The HOMD database used contains 46,296 sequences; 1,195,875,138 total letters.**



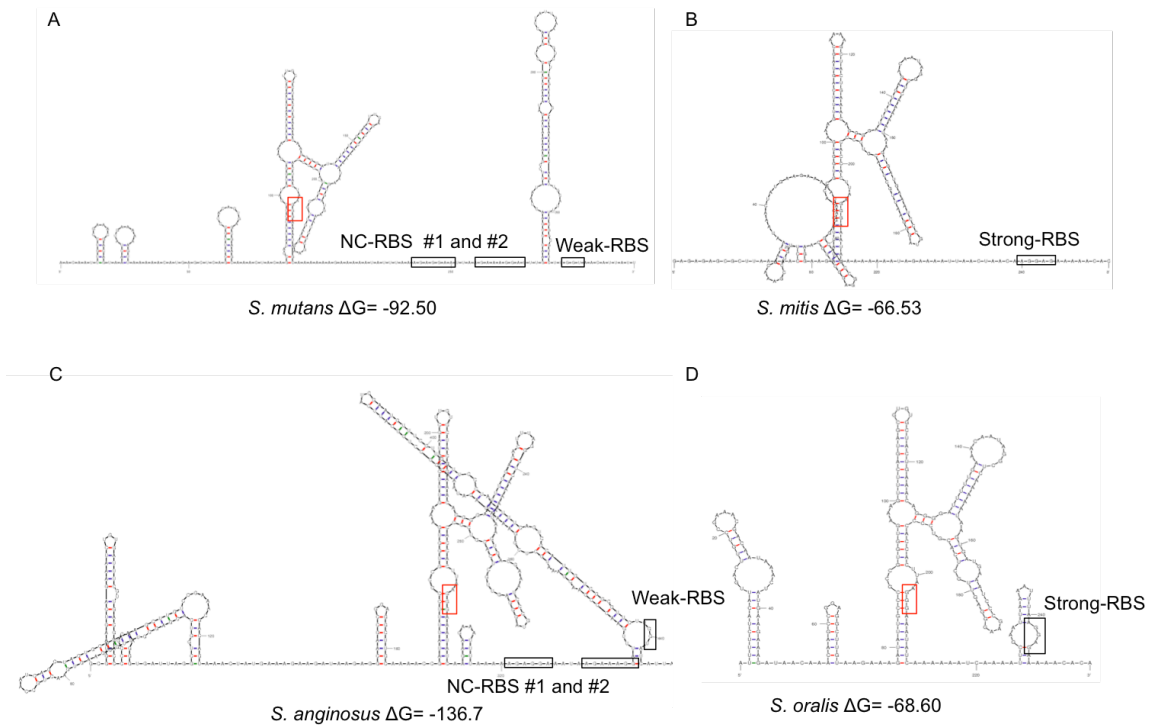

**Figure S12. Predicted secondary structures of the *grpE-dnaK* intergenic regions from selected streptococci.** Predicted structures were determined using the latest version of the mfold Web Server (<http://mfold.rna.albany.edu>). Predicted secondary structures of the *grpE-dnaK* intergenic regions from: *S. mutans* (A), *S. mitis* (B), *S. anginosus* (C), and *S. oralis* (D). The location of a strong RBS, weak RBS, and/or NC-RBS is indicated for each predicted structure in black boxes. The location of a processing site in *S. mutans igr66* that was identified using 5'RACE is highlighted with a red box. See text for additional details.
